# Supplementary material for: Artificial intelligence in clinical and translational science: Successes, challenges and opportunities
Source: PubMed Central journal article supplement — Clin Transl Sci. 2021 Oct 30;15(2):309–21. doi: 10.1111/cts.13175 (PMC8841416; doi:10.1111/cts.13175), 2021-10-30

# AI Synergy

Please complete the survey below.

Thank you!

## AI Synergy Survey

**The purpose of this survey is to assess the current state of AI projects in clinical and translational science.**

**For each AI project which your institution has supported over the last 5 years (funded by institutional or extramural funds), please complete the following questions. Eligible systems include those that are supported by the health system (e.g., decision support using AI for quality improvement) or funded research (i.e., systems funded by the NIH, NSF, etc.; not trainee projects that are not expected to be used outside of the student project).**

**Please share the survey link with others at your institution that may know of additional projects.**

## Institution

- ALBERT EINSTEIN COLLEGE OF MEDICINE
- BOSTON UNIVERSITY
- CASE WESTERN RESERVE UNIVERSITY
- CHILDREN'S RESEARCH INSTITUTE
- COLUMBIA UNIVERSITY HEALTH SCIENCES
- DUKE UNIVERSITY
- EMORY UNIVERSITY
- GEORGETOWN UNIVERSITY
- HARVARD MEDICAL SCHOOL
- INDIANA UNIV-PURDUE UNIV AT INDIANAPOLIS
- JOHNS HOPKINS UNIVERSITY
- MAYO CLINIC ROCHESTER
- MEDICAL COLLEGE OF WISCONSIN
- MEDICAL UNIVERSITY OF SOUTH CAROLINA
- NEW YORK UNIVERSITY SCHOOL OF MEDICINE
- NORTHWESTERN UNIVERSITY AT CHICAGO
- OHIO STATE UNIVERSITY
- OREGON HEALTH & SCIENCE UNIVERSITY
- PENN STATE UNIVERSITY
- ROCKEFELLER UNIVERSITY
- RUTGERS BIOMEDICAL/HEALTH SCIENCES-RBHS
- SCRIPPS RESEARCH INSTITUTE
- STANFORD UNIVERSITY
- STATE UNIVERSITY OF NEW YORK AT BUFFALO
- TUFTS UNIVERSITY BOSTON
- UNIV OF ARKANSAS FOR MED SCIS
- UNIV OF MASSACHUSETTS MED SCH WORCESTER
- UNIV OF NORTH CAROLINA CHAPEL HILL
- UNIVERSITY OF ALABAMA AT BIRMINGHAM
- UNIVERSITY OF CALIFORNIA AT DAVIS
- UNIVERSITY OF CALIFORNIA LOS ANGELES
- UNIVERSITY OF CALIFORNIA, SAN DIEGO
- UNIVERSITY OF CALIFORNIA, SAN FRANCISCO
- UNIVERSITY OF CALIFORNIA-IRVINE
- UNIVERSITY OF CHICAGO
- UNIVERSITY OF CINCINNATI
- UNIVERSITY OF COLORADO DENVER
- UNIVERSITY OF FLORIDA
- UNIVERSITY OF ILLINOIS AT CHICAGO
- UNIVERSITY OF IOWA
- UNIVERSITY OF KANSAS MEDICAL CENTER
- UNIVERSITY OF KENTUCKY
- UNIVERSITY OF MIAMI SCHOOL OF MEDICINE
- UNIVERSITY OF MICHIGAN AT ANN ARBOR
- UNIVERSITY OF MINNESOTA
- UNIVERSITY OF NEW MEXICO HEALTH SCIS CTR
- UNIVERSITY OF PENNSYLVANIA
- UNIVERSITY OF PITTSBURGH AT PITTSBURGH
- UNIVERSITY OF ROCHESTER
- UNIVERSITY OF SOUTHERN CALIFORNIA
- University of Texas Health Science Center San Antonio
- UNIVERSITY OF TEXAS HLTH SCI CTR HOUSTON
- UNIVERSITY OF TEXAS MED BR GALVESTON
- UNIVERSITY OF UTAH
- UNIVERSITY OF VIRGINIA
- UNIVERSITY OF WASHINGTON
- UNIVERSITY OF WISCONSIN-MADISON
- VANDERBILT UNIVERSITY MEDICAL CENTER
- VIRGINIA COMMONWEALTH UNIVERSITY
- WAKE FOREST UNIVERSITY HEALTH SCIENCES
- Washington University in St. Louis
- WEILL MEDICAL COLL OF CORNELL UNIV
- YALE UNIVERSITY

---

My institution has systems fulfilling criteria.  Yes  No

---

Project Title \_\_\_\_\_

---

Year project began    
 2020   
 2019   
 2018   
 2017   
 2016   
 2015   
 2014   
 2013   
 2012   
 2011   
(Select valid year)

---

Year project ended (leave blank if ongoing)  2020   
 2019   
 2018   
 2017   
 2016   
 2015   
 2014   
 2013   
 2012   
 2011   
(Select valid year or blank for ongoing)

---

Translational phase : Under which translational phase(s) does the project fall? Select all that apply.   
 T0: Basic research   
 T1: Pre-clinical; basic science -> human medicine   
 T2: Clinical research: better understand a disease in humans   
 T3: Clinical implementation: research environment -> general population   
 T4: Public health   
 None

---

Funding: How is the project funded? Select all that apply.   
 Institutional funds   
 Philanthropy or Foundation funding   
 Local or state government funding   
 Federal funding   
 None

---

Intended users: Who is the intended user of the project? A user is defined as the primary group that is expected to use the system routinely or most often. Select all that apply.   
 Researchers   
 Clinicians   
 Patients/public   
 Administrators   
 Other   
 None

---

If other, please list additional intended users: \_\_\_\_\_

---

AI approach: Select all that apply.

- Rule based system
- Symbolic approach, but not rule based system
- Unsupervised machine learning
- Supervised machine learning
- Deep learning (or other neural network)
- Other
- None

---

If another AI approach is used, please specify.

\_\_\_\_\_

---

Please add at least one MeSH term applicable to your project.

\_\_\_\_\_ (One MeSH term per text box)

---

Would you like to add another project?

- Yes
- No

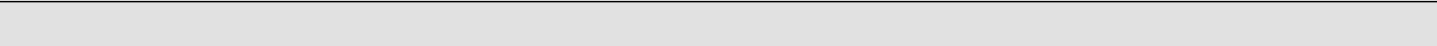

Supplement: CTS-15-309-s002.pdf [file CTS-15-309-s002.pdf]
